# Supplementary material for: Eclipse Prediction on the Ancient Greek Astronomical Calculating Machine Known as the Antikythera Mechanism
Source: PLOS journal article supplement (doi:10.1371/journal.pone.0103275), 2014-07-30
Supplement: S4 (10.1371/journal.pone.0103275.s004) [file journal.pone.0103275.s004]

**A****PRICE: GEARS FROM THE GREEKS**

Page 48, Fig. 37 Lower back dial inscription

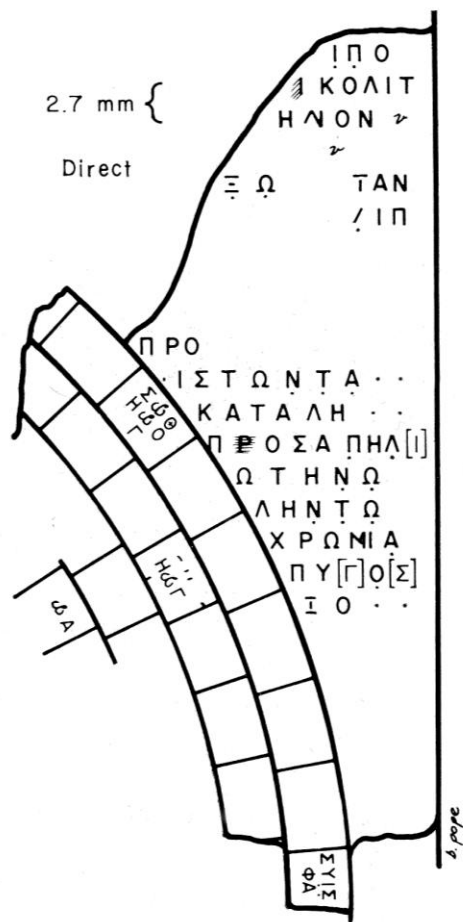**B****Greek Text of Back Plate inscription, near the Lower Back Dial**

Black and blue letters are believed to be good, red and orange are dubious. Black and red are from fragments A and F, blue and orange from the other side of fragment E.

|    |    |                         |
|----|----|-------------------------|
| 1  | 1  | Ι Π Ο                   |
| 2  | 2  | Ι Κ Ο Λ Ι Τ             |
| 3  | 3  | Ι Ν Ο Ν                 |
| 4  | 4  | Α Π Ο Χ Ο Ο             |
| 5  | 5  | Δ Ε Κ Α Τ Ε Ω Ν Τ Α Ν   |
| 6  | 6  | Λ Ι Β Α Ν Χ Ι Π         |
| 7  | 7  | Λ Μ Α                   |
| 8  | 8  | Ν                       |
| 9  | 9  |                         |
| 10 | 10 | Π Ρ Ο                   |
| 11 | 11 | Ι Σ Τ Ω Ν Τ Α Σ         |
| 12 | 12 | Κ Α Τ Α Λ Η             |
| 13 | 13 | Π Ρ Ο Σ Α Π Η Λ         |
| 14 | 14 | Ω Τ Η Ν Ω               |
| 15 | 15 | Λ Η Ν Τ Ω               |
| 16 | 16 | Χ Ρ Ω Ν Ι Α             |
| 17 | 17 | Π Υ Ο                   |
| 18 | 18 | Ι Ο                     |
|    | // |                         |
| 19 |    |                         |
| 20 |    | Φ                       |
| 21 |    | Ρ Ι Ι Σ                 |
| 22 |    | Τ Α Α Δ                 |
| 23 |    | Ν Ο Τ Ο Ν               |
| 24 |    | Κ Α Ι Α Ρ Η Σ           |
| 25 |    | Σ Η Φ Α Ρ Ο Σ           |
| 26 |    | Λ Ε Ν Τ Η Ν Κ           |
| 27 |    | Σ Α Φ Υ Λ Α Ε Α Σ       |
| 28 |    | Ι Λ Α Μ Ε Λ Α Ν         |
| 29 |    | Χ 2 Π Κ Ζ Φ             |
| 30 |    | Α Π Ο Ν Ο Τ Ο Υ Π Ε Ρ Ι |
| 31 |    | Ι Σ Π Α Ν Ι Α Σ Δ Ε Κ Α |
| 32 |    | Δ Υ Σ Α Ν               |
| 33 |    |                         |
| 34 |    |                         |

Courtesy American Philosophical Association, 1974

Reprinted by permission from Macmillan Publishers Ltd: *Nature* 444, Freeth et al., 2006

**Figure S4 | The published inscriptions round the Saros Dial. (A)** As published in 1974 [6]. **(B)** As published in 2006 [1]. The text in blue and orange on the left of lines 4 - 7 is one row too high.
