# Supplementary material for: Eclipse Prediction on the Ancient Greek Astronomical Calculating Machine Known as the Antikythera Mechanism
Source: PLOS journal article supplement (doi:10.1371/journal.pone.0103275), 2014-07-30
Supplement: S6 (10.1371/journal.pone.0103275.s006) [file journal.pone.0103275.s006]

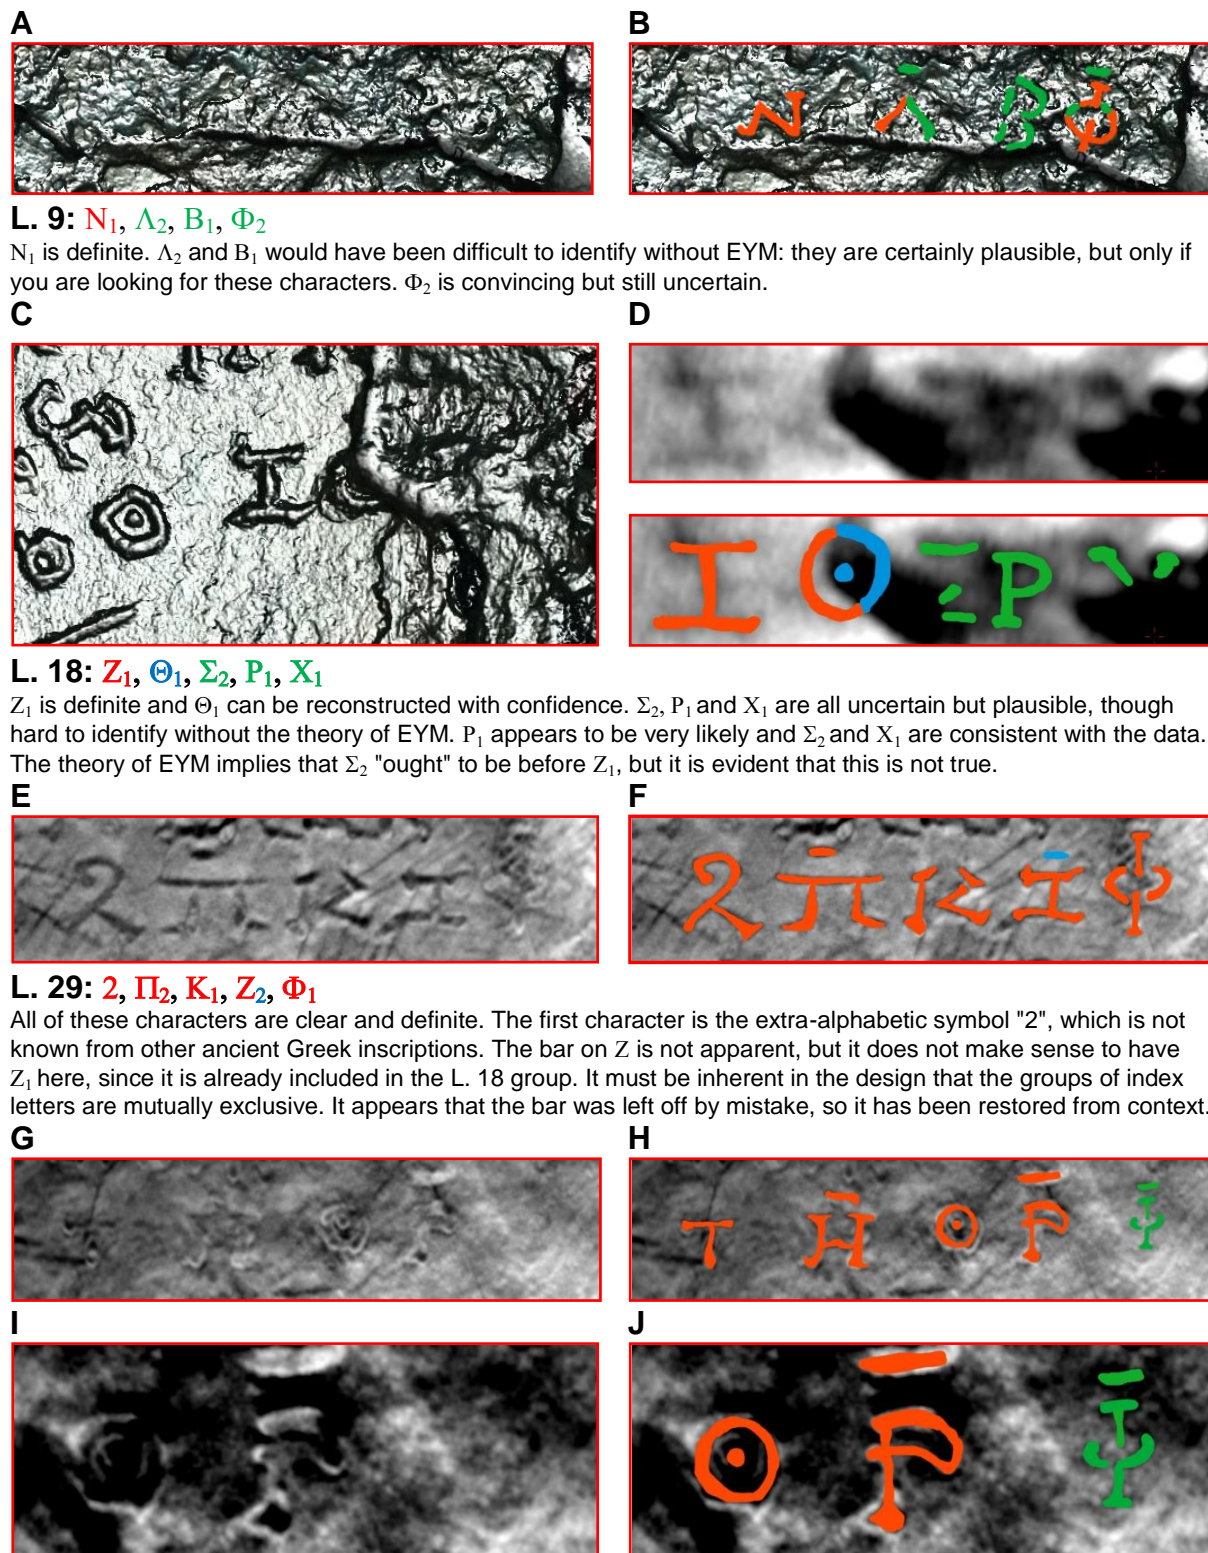

**L. 9:  $N_1, \Lambda_2, B_1, \Phi_2$**

$N_1$  is definite.  $\Lambda_2$  and  $B_1$  would have been difficult to identify without EYM: they are certainly plausible, but only if you are looking for these characters.  $\Phi_2$  is convincing but still uncertain.

**L. 18:  $Z_1, \Theta_1, \Sigma_2, P_1, X_1$**

$Z_1$  is definite and  $\Theta_1$  can be reconstructed with confidence.  $\Sigma_2$ ,  $P_1$  and  $X_1$  are all uncertain but plausible, though hard to identify without the theory of EYM.  $P_1$  appears to be very likely and  $\Sigma_2$  and  $X_1$  are consistent with the data. The theory of EYM implies that  $\Sigma_2$  "ought" to be before  $Z_1$ , but it is evident that this is not true.

**L. 29:  $2, \Pi_2, K_1, Z_2, \Phi_1$**

All of these characters, are clear and definite. The first character is the extra-alphabetic symbol "2", which is not known from other ancient Greek inscriptions. The bar on Z is not apparent, but it does not make sense to have  $Z_1$  here, since it is already included in the L. 18 group. It must be inherent in the design that the groups of index letters are mutually exclusive. It appears that the bar was left off by mistake, so it has been restored from context.

**L. 36:  $T_1, H_2, \Theta_1, P_2, \Psi_2$**

All are clear and definite, except for  $\Psi_2$ , which is hard to read, though definitely plausible. In terms of EYM, this character is optional: it is simply a matter of how the EYM limits are set, as discussed in Note S3. Since the characters before  $\Psi_2$  are clear in the X-ray CT, it might be expected that  $\Psi_2$  would also be easy to read. However, the surface of Fragment F is clearly damaged in the region of  $\Psi_2$  but not in the region of the other characters.

Background data: *Courtesy Antikythera Mechanism Research Project, 2005.* Foreground graphics: *Courtesy Tony Freeth, 2013.*

**Figure S6 | Data and interpretation for Index Letter Groups.** Red = definite; Blue = restored from context; Green = uncertain. (A) - (B) L. 9: PTM of Fragment A. (C) L. 18: PTM of Fragment A. (D) L. 18: X-ray CT of Fragment A. (E) - (F) L. 29: X-ray CT of Fragment A. (G) - (J) L. 36: X-ray CT of Fragment A, with close-ups.
