# Supplementary material for: Eclipse Prediction on the Ancient Greek Astronomical Calculating Machine Known as the Antikythera Mechanism
Source: PLOS journal article supplement (doi:10.1371/journal.pone.0103275), 2014-07-30
Supplement: S7 (10.1371/journal.pone.0103275.s007) [file journal.pone.0103275.s007]

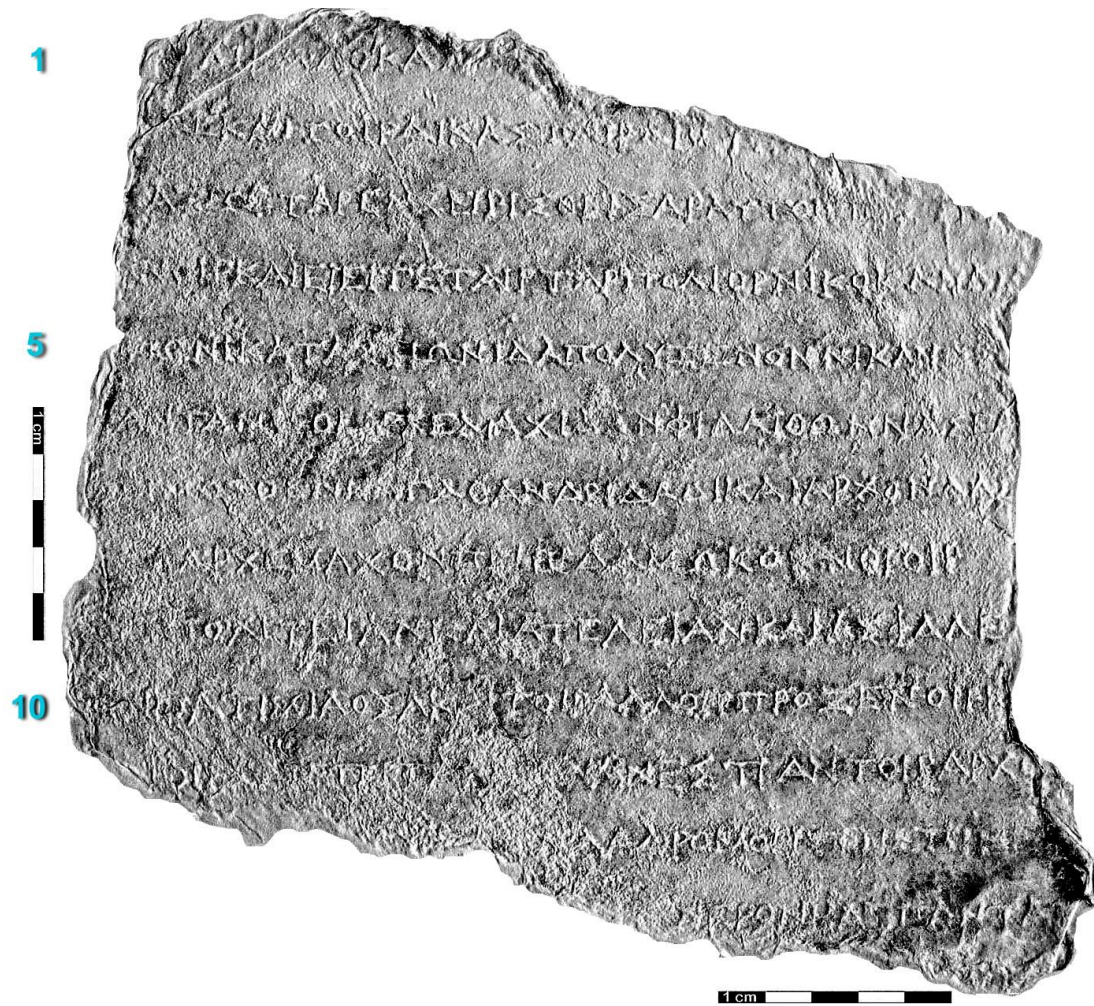

Courtesy Centre for the Study of Ancient Documents, 2013

**Figure S7 | Comparative inscription on stone from Hellenistic Corinth.** Photograph of a paper squeeze of SEG XXVI 392.
