# Supplementary material for: Eclipse Prediction on the Ancient Greek Astronomical Calculating Machine Known as the Antikythera Mechanism
Source: PLOS journal article supplement (doi:10.1371/journal.pone.0103275), 2014-07-30
Supplement: S8 (10.1371/journal.pone.0103275.s008) [file journal.pone.0103275.s008]

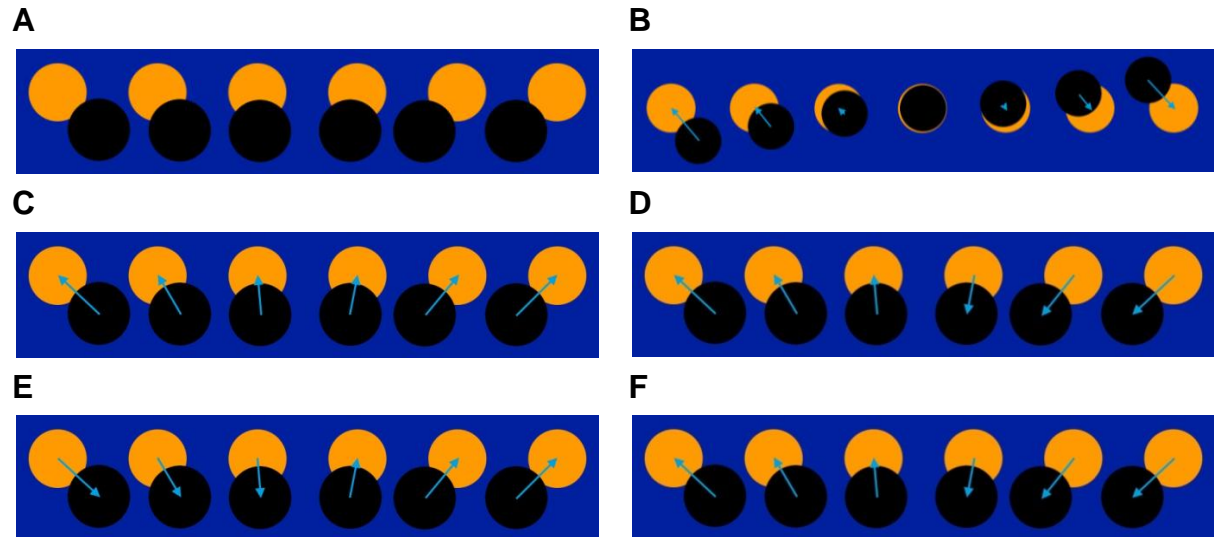

Courtesy Tony Freeth, 2013

**Figure S8 | Possible definitions of directions of obscuration.** Time progresses from left to right. **(A)** Graphic of total solar eclipse of 2006 Mar-29, seen as a partial eclipse from Puertollano, Spain (39°N, 40°W), which is well North of the eclipse path at this longitude.  $\Gamma = 0.3843$ . **(B)** Graphic of annular solar eclipse of 2012 May-20, as seen from Chico, California (40°N, 122°W), which was on the eclipse path.  $\Gamma = 0.4828$ . **(C) - (F)** Possible conventions for defining the *shadow vector*. These can be characterized as **(c)** *Always Towards*; **(D)** *Towards then Away*; **(E)** *Away then Towards*. **(F)** *Always Away*.
