# Supplementary material for: Eclipse Prediction on the Ancient Greek Astronomical Calculating Machine Known as the Antikythera Mechanism
Source: PLOS journal article supplement (doi:10.1371/journal.pone.0103275), 2014-07-30
Supplement: S12 (10.1371/journal.pone.0103275.s012) [file journal.pone.0103275.s012]

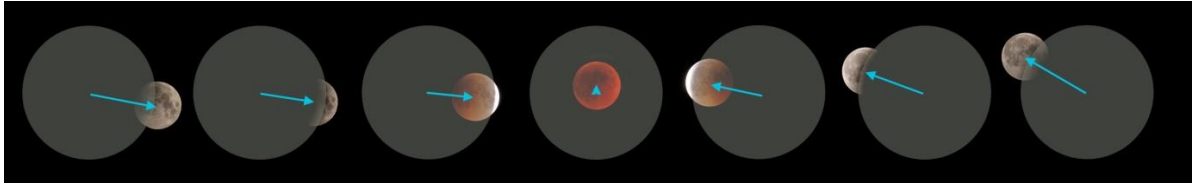

*Courtesy Tony Freeth, 2013*

**Figure S12 | Graphic of Total lunar eclipse of 2011 Jun-15.** The sequence should be read from left to right. The eclipse was at the Ascending Node, just North of the node:  $\gamma = 0.0897$ . The blue arrow shows the directions of the *shadow vector*.
