# Supplementary material for: Eclipse Prediction on the Ancient Greek Astronomical Calculating Machine Known as the Antikythera Mechanism
Source: PLOS journal article supplement (doi:10.1371/journal.pone.0103275), 2014-07-30
Supplement: S14 (10.1371/journal.pone.0103275.s014) [file journal.pone.0103275.s014]

A: Glyph 72

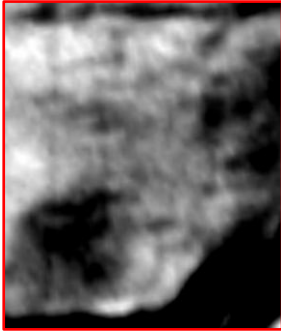

B: Glyph 72

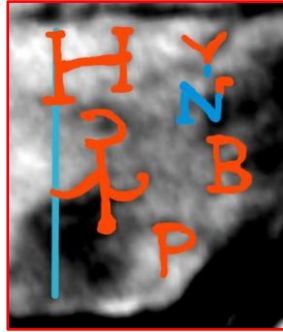

C: Glyph 78

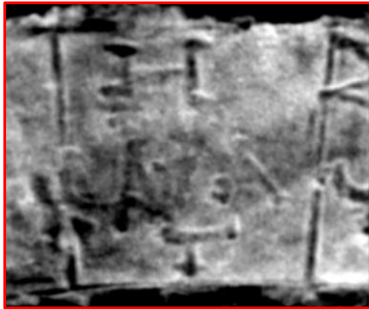

D: Glyph 78

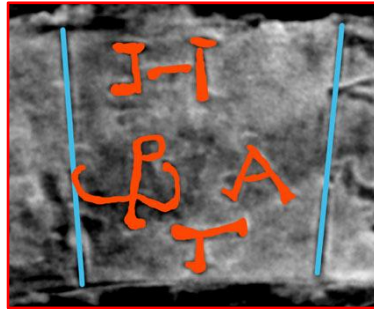

E: Glyph 119

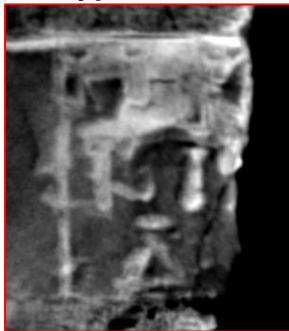

F: Glyph 119

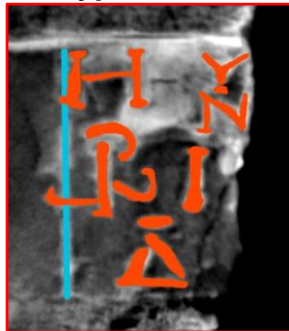

G: Glyph 125

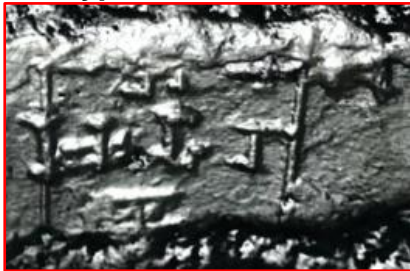

H: Glyph 125

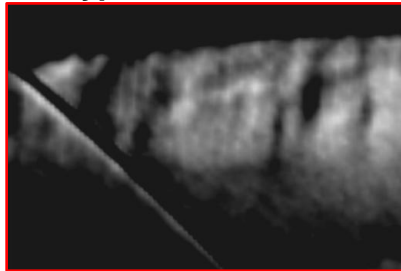

I: Glyph 137

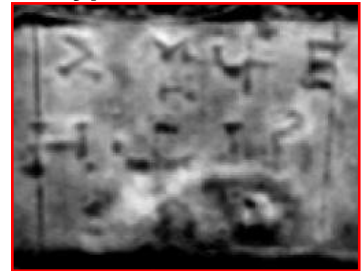

J: Glyph 172

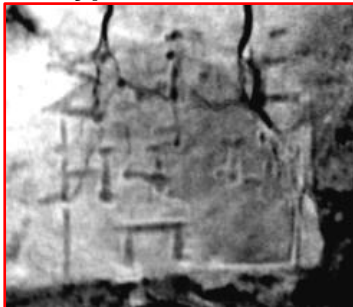

K: Glyph 172

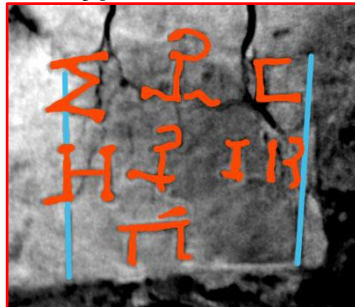

Background data: *Courtesy Antikythera Mechanism Research Project, 2005.* Foreground graphics: *Courtesy Tony Freeth, 2013.*

**Figure S14 | Data for questioned glyph times.** (G) is from PTM; all the rest from X-ray CT. For discussion, see Note S4.
