# Supplementary material for: Eclipse Prediction on the Ancient Greek Astronomical Calculating Machine Known as the Antikythera Mechanism
Source: PLOS journal article supplement (doi:10.1371/journal.pone.0103275), 2014-07-30
Supplement: S15 (10.1371/journal.pone.0103275.s015) [file journal.pone.0103275.s015]

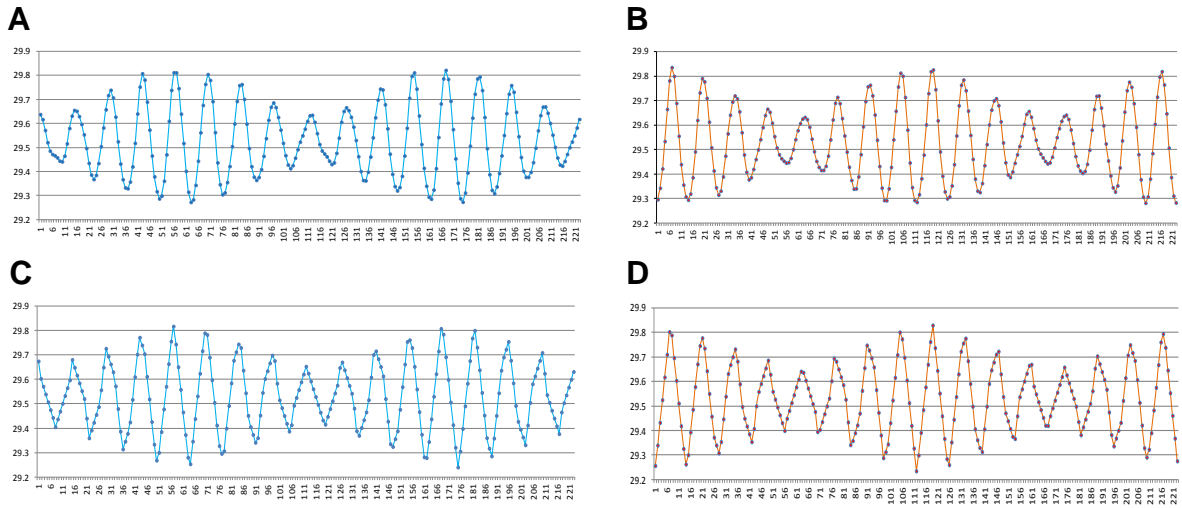

Courtesy Tony Freeth, 2013

**Figure S15 | Actual month lengths vs ZYM month lengths. (A)** Actual month lengths in days, FM to FM. **(B)** Actual month lengths in days, NM to NM. **(C)** ZYM month lengths in days, FM to FM. **(D)** ZYM month lengths in days, NM to NM. For discussion, see Note S4.
