# Supplementary material for: Eclipse Prediction on the Ancient Greek Astronomical Calculating Machine Known as the Antikythera Mechanism
Source: PLOS journal article supplement (doi:10.1371/journal.pone.0103275), 2014-07-30
Supplement: S21 (10.1371/journal.pone.0103275.s021) [file journal.pone.0103275.s021]

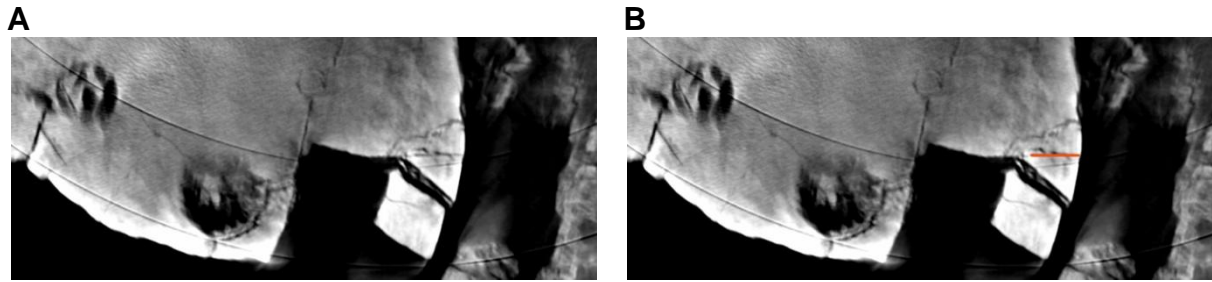

A, B: Data courtesy Antikythera Mechanism Research Project, 2005.

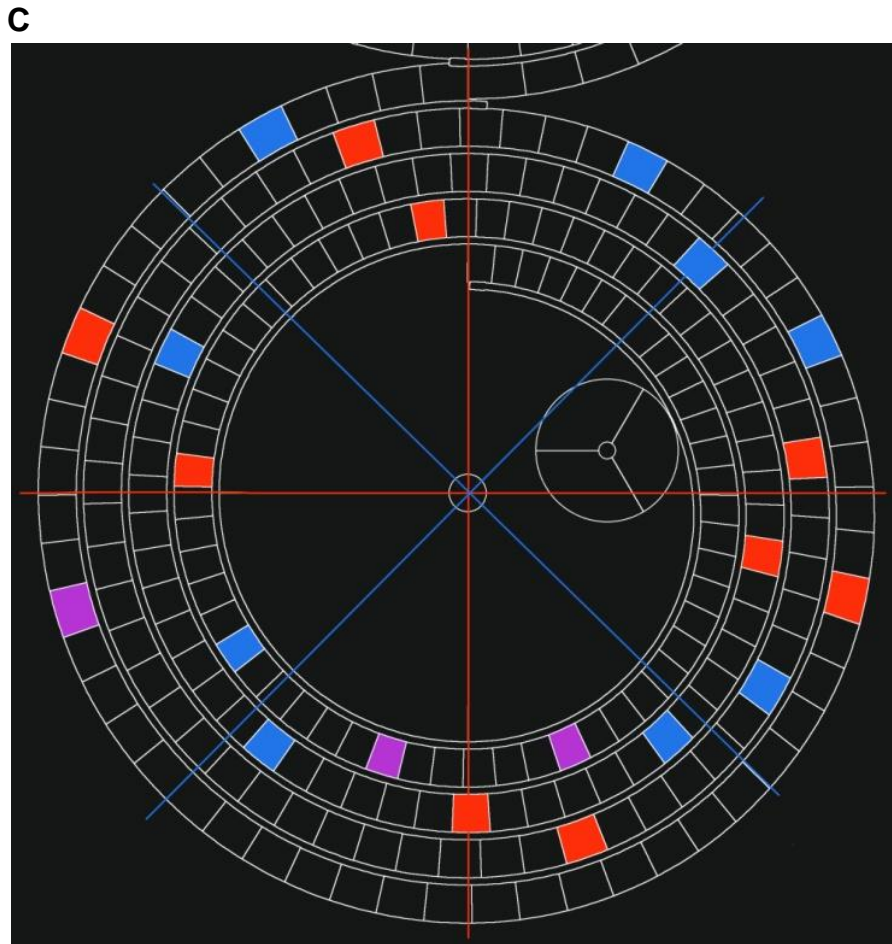

C: Courtesy Tony Freeth, 2013

**Figure S21 | The Saros Dial and the Full Moon Cycle.**

(A) X-ray CT of Fragment A, showing possible Full Moon Cycle mark at the 3 o'clock position of the central disk of the Saros Dial. (B) The mark is highlighted in red.

(C) Central eclipses from the matching sequence starting in -204 May-12. Total ■, Annular ■ and Hybrid ■ solar eclipses. Total eclipses are centred around the cardinal points (marked by the red lines); Annular eclipses are centred around the intercardinal points (marked by the blue lines); and Hybrid eclipses are between these two regions.
