# Supplementary material for: Eclipse Prediction on the Ancient Greek Astronomical Calculating Machine Known as the Antikythera Mechanism
Source: PLOS journal article supplement (doi:10.1371/journal.pone.0103275), 2014-07-30
Supplement: S22 (10.1371/journal.pone.0103275.s022) [file journal.pone.0103275.s022]

| L.9                             | L.18                                    |                                                     |                                       |  |  | L.29 |  |  |  |  | L.36 |  |  |  |  |
|---------------------------------|-----------------------------------------|-----------------------------------------------------|---------------------------------------|--|--|------|--|--|--|--|------|--|--|--|--|
| $N_1$ $A_2$ $B_1$ $\Phi_2$      | $Z_1$ $\Theta_1$ $\Sigma_2$ $P_1$ $X_1$ | 2 $\Pi_2$ $K_1$ $Z_2$ $\Phi_1$                      | $T_1$ $H_2$ $\Theta_1$ $P_2$ $\Psi_2$ |  |  |      |  |  |  |  |      |  |  |  |  |
| 55   154   8   201              | 25   31   184   72   90                 | 213   172   37   125   84                           | 78   131   31   178   207             |  |  |      |  |  |  |  |      |  |  |  |  |
| $\Sigma, H$ $H$ $\Sigma, H$ $H$ | $H$ $H$ $\Sigma, H$ $H$ $\Sigma, H$     | $H$ $\Sigma, H$ $\Sigma, H$ $\Sigma, H$ $\Sigma, H$ | $H$ $\Sigma, H$ $H$ $\Sigma, H$ $H$   |  |  |      |  |  |  |  |      |  |  |  |  |

**Table S1 | The observed index letter groups and corresponding glyphs.** Where the glyph is missing, it has been reconstructed according to EYM. **Red** = observed; **Blue** = reconstructed. One feature that all these glyphs have in common is that they index solar EPs. Less than half also index lunar EPs. So these Index Letter Groups must refer to solar EPs and the corresponding lines of inscription describe shared characteristics of solar eclipses.
