# Supplementary material for: Eclipse Prediction on the Ancient Greek Astronomical Calculating Machine Known as the Antikythera Mechanism
Source: PLOS journal article supplement (doi:10.1371/journal.pone.0103275), 2014-07-30
Supplement: S23 (10.1371/journal.pone.0103275.s023) [file journal.pone.0103275.s023]

| First Node<br>Lunar glyphs |             | Second Node<br>Lunar glyphs |              | First Node<br>Solar glyphs |             | Second Node<br>Solar glyphs |              |
|----------------------------|-------------|-----------------------------|--------------|----------------------------|-------------|-----------------------------|--------------|
| Month                      | EYu         | Month                       | EYu          | Month                      | EYu         | Month                       | EYu          |
| 26                         | 75          | 20                          | 293          | 13                         | 46          | 78                          | 286          |
| 120                        | 79          | 67                          | 295          | 25                         | 56          | 125                         | 288          |
| 131                        | 51          | 79                          | 305          | 72                         | 58          | 137                         | 298          |
| 178                        | 53          | 114                         | 297          | 119                        | 60          | 172                         | 290          |
| 190                        | 63          | 125                         | 269          | 131                        | 70          | 184                         | 300          |
|                            |             | 137                         | 279          | 178                        | 72          |                             |              |
| <i>Mean</i>                | <b>64.2</b> | <i>Mean</i>                 | <b>289.7</b> | <i>Mean</i>                | <b>60.3</b> | <i>Mean</i>                 | <b>292.4</b> |
| <i>Min</i>                 | 51          | <i>Min</i>                  | 269          | <i>Min</i>                 | 46          | <i>Min</i>                  | 286          |
| <i>Max</i>                 | 79          | <i>Max</i>                  | 305          | <i>Max</i>                 | 72          | <i>Max</i>                  | 300          |
| <i>Range</i>               | 28          | <i>Range</i>                | 36           | <i>Range</i>               | 26          | <i>Range</i>                | 14           |

**Table S2 | The positions of the observed glyphs on the Saros Dial.** The glyphs are measured in EYu relative to the start of the Eclipse Year. A first approximation to the positions of the node points can be obtained by averaging the positions in the eclipse year of the observed glyphs, with lunar glyphs preferred because of the asymmetry of solar glyphs. The mean position of the observed lunar glyphs near the first node point is 64.2 EYu from the start of the eclipse year and near the second node point is 289.7 EYu. As described in the main text, 66 EYu and 289 EYu are adopted for EYM.
