# Supplementary material for: Eclipse Prediction on the Ancient Greek Astronomical Calculating Machine Known as the Antikythera Mechanism
Source: PLOS journal article supplement (doi:10.1371/journal.pone.0103275), 2014-07-30
Supplement: S24 (10.1371/journal.pone.0103275.s024) [file journal.pone.0103275.s024]

## A

| Month | CERTAIN / VERY LIKELY |          |               |          | UNCERTAIN       |          |                 |              | Comment                                                      |
|-------|-----------------------|----------|---------------|----------|-----------------|----------|-----------------|--------------|--------------------------------------------------------------|
|       | Certain Lunar         | Hrs mech | Certain Solar | Hrs mech | Uncertain Lunar | Hrs mech | Uncertain solar | Hrs Mech     |                                                              |
| 13    |                       |          |               |          |                 |          | Night?, 1 or 4  | 1, 4, 13, 16 | N <sup>LY</sup> cannot be excluded. Time Δ or A.             |
| 20    | Night, 6              | 18       |               |          |                 |          |                 |              |                                                              |
| 25    |                       |          | Day, 6        | 6        |                 |          |                 |              |                                                              |
| 26    | Day, 7                | 7        |               |          |                 |          |                 |              |                                                              |
| 67    |                       |          |               |          |                 |          |                 |              | No time information                                          |
| 72    |                       |          | Night, 2      | 14       |                 |          |                 |              | N <sup>LY</sup> very likely. H in Nature 2008, but B likely. |
| 78    |                       |          | Day, 1        | 1        |                 |          |                 |              | Wrong in Nature 2008. Day 1 almost certain.                  |
| 79    | Day, 10               | 10       |               |          |                 |          |                 |              |                                                              |
| 114   | Day, 12               | 12       |               |          |                 |          |                 |              |                                                              |
| 119   |                       |          | Night, 10     | 22       |                 |          |                 |              | Probably no text after I.                                    |
| 120   |                       |          |               |          | 12?             | 12?      |                 |              | Probably H <sup>M</sup> . Time uncertain—possibly IB.        |
| 125   | Day, 2                | 2        | Day, 3        | 3        |                 |          |                 |              | H in Nature 2008. B very likely—compare 137                  |
| 131   | Night, 2              | 14       | Night, 9      | 21       |                 |          |                 |              |                                                              |
| 137   | Day, 5                | 5        | Day, 12       | 12       |                 |          |                 |              |                                                              |
| 172   | Night, 6              | 18       | Day, 12       | 12       |                 |          |                 |              | Lunar wrong in Nature 2008: S is clear                       |
| 178   | Night, 9              | 21       | Day, 9        | 9        |                 |          |                 |              |                                                              |
| 184   | Day, 4                | 4        | Day, 1        | 1        |                 |          |                 |              |                                                              |
| 190   | Day, 9                | 9        |               |          |                 |          |                 |              |                                                              |

## B

| LUNAR |         | SOLAR |         |
|-------|---------|-------|---------|
| Month | 24-hour | Month | 24-hour |
| 20    | 18      | 25    | 6       |
| 26    | 7       | 72    | 14      |
| 79    | 10      | 78    | 1       |
| 114   | 12      | 119   | 22      |
| 125   | 2       | 125   | 3       |
| 131   | 14      | 131   | 21      |
| 137   | 5       | 137   | 12      |
| 172   | 18      | 172   | 12      |
| 178   | 21      | 178   | 9       |
| 184   | 4       | 184   | 1       |
| 190   | 9       |       |         |

**Table S3 | Eclipse times in the glyphs.** (A) Tabulation of the certain / uncertain eclipse time data in the glyphs. (B) Eclipse times that are regarded as certain / likely.
